# Supplementary material
Source: PubMed Central journal article supplement (PMC3578142)
Supplement: NIHMS418556-supplement-01.pdf [file NIHMS418556-supplement-01.pdf]

Supplementary material

Supplementary Table 1 - SNPs found associated with LOAD by GWAS assessing >1500 cases and >1500 controls

| Locus | SNP              | GWAS                |                      |                         |                           |                 |                  | Function class | Regulatory region            | CpG Island |
|-------|------------------|---------------------|----------------------|-------------------------|---------------------------|-----------------|------------------|----------------|------------------------------|------------|
|       |                  | Harold et al., 2009 | Lambert et al., 2009 | Corneveaux et al., 2010 | Hollingworth et al., 2011 | Hu et al., 2011 | Naj et al., 2011 |                |                              |            |
| CR1   | rs6701713        | ☐                   |                      |                         |                           |                 | ☐                |                | intron                       |            |
|       | rs1408077        | ☐                   |                      |                         |                           |                 |                  |                | intron                       |            |
|       | <b>rs3818361</b> | ☐                   | ☐                    |                         | ☐                         |                 |                  |                | intron                       |            |
|       | <b>rs6656401</b> |                     | ☐                    | ☐                       |                           |                 |                  |                | intron                       |            |
| BIN1  | <b>rs744373</b>  |                     |                      |                         | ☐                         | ☐               |                  | ☐              | locus region<br>(5' of BIN1) |            |
|       | rs7561528        |                     |                      |                         |                           | ☐               | ☐                |                | locus region<br>(5' of BIN1) |            |

|        |                  |   |   |   |   |   |   |                                   |                                   |     |  |
|--------|------------------|---|---|---|---|---|---|-----------------------------------|-----------------------------------|-----|--|
|        | rs12989701       |   |   |   |   | □ |   |                                   | locus region<br>(5' of BIN1)      |     |  |
| PICALM | rs561655         | □ |   |   |   |   |   | □                                 | locus region<br>(5' of<br>PICALM) |     |  |
|        | <b>rs541458</b>  | □ | □ | □ |   |   |   |                                   | locus region<br>(5' of<br>PICALM) |     |  |
|        | rs592297         | □ |   |   |   |   |   |                                   | coding<br>synonymous<br>(Q174Q)   | Yes |  |
|        | rs3851179        | □ |   |   |   |   |   | □                                 | locus region<br>(5' of<br>PICALM) |     |  |
| MS4A4A | <b>rs4938933</b> |   |   |   | □ |   | □ | locus region<br>(5' of<br>MS4A4A) |                                   |     |  |
| MS4A4E | <b>rs670139</b>  |   |   |   | □ |   | □ | locus region                      |                                   |     |  |

|        |                  |   |   |   |   |  |   |   |                              |     |     |
|--------|------------------|---|---|---|---|--|---|---|------------------------------|-----|-----|
|        |                  |   |   |   |   |  |   |   | (3' of MS4A4E)               |     |     |
| MS4A6A | <b>rs610932</b>  |   |   |   | □ |  |   |   | mrna-utr                     |     |     |
| ABCA7  | <b>rs3752246</b> |   |   |   | □ |  | □ |   | coding non-synonymous G1527A | Yes |     |
|        | <b>rs3764650</b> |   |   |   | □ |  | □ |   | intron                       |     | Yes |
| CLU    | rs11136000       | □ | □ | □ |   |  |   | □ | intron                       |     |     |
|        | rs1532278        |   |   |   |   |  |   | □ | intron                       |     |     |
| CD2AP  | rs9349407        |   |   |   | □ |  |   | □ | intron                       |     |     |
| EPHA1  | rs11767557       |   |   |   | □ |  |   | □ | locus region (5' of EPHA1)   |     |     |
| CD33   | rs3865444        |   |   |   | □ |  |   | □ | locus region                 |     |     |

In bold are represented the SNPs used in the present study to assess the LD with common coding variability in the respective genes.
